# Supplementary material for: Can Modern NLP Systems Reliably Annotate Chest Radiography Exams? A Pre-Purchase Evaluation and Comparative Study of Solutions from AWS, Google, Azure, John Snow Labs, and Open-Source Models on an Independent Pediatric Dataset
Source: Research Square preprint supplement (doi:10.21203/rs.3.rs-6772394/v1), 2025-06-16
Supplement: Supplementary file 1 [file 52aab80bca16e33278a447ed.docx]

**Appendix A: Regular Expression Patterns for CheXpert Disease Labels**

This appendix provides the specific regular expression (RegEx) patterns and label mapping utilized to map extracted clinical entities to the 13 predefined CheXpert (12 disease and 1 no findings) categories. These patterns are designed to capture various linguistic expressions and clinical concepts related to each disease category within pediatric chest radiography reports, aligning with the CheXpert framework.

**GitHub Reference:** The RegEx patterns and label mapping are based on the CheXpert labeler, with specific adaptations. More details can be found at: [https://github.com/cchmc-dll/Chexpert_Label_Mapping/](https://github.com/cchmc-dll/Chexpert_Label_Mapping/blob/main/chexpert_regex_patterns.py)

**1. Cardiomegaly**

- **Description:** Detects mentions of an enlarged heart, including terms like "cardiomegaly" and phrases indicating increased heart size. It excludes mentions related to heart functions (e.g., heart rate, heart rhythm).
- **RegEx Pattern:**

(?i)^

(?:

(?=.*\bcardiomegaly\b)

|

(?=.*\b(?:heart|cardiac|cardiopericardial)\b)

(?=.*\b(?:

enlarge(?:d|ment|ing)?|

big(?:ger|gest)?|

increase(?:d|s|ing)?|

dilate(?:d|ing)?|

prominence|

prominent(?:ly)?|

abnorm(?:al|ity|ally)|

borderline|

deviat(?:ed|ion|ing)?|

large\w*|

bulk\w*|

wide(?:en|r|ning)?|

efface\w*|

exaggerate(?:d|ing)?

)\b)

)

(?!.*\b(?:heart rate|heart rhythm|heart sound|heart murmur|heart block|heart beat|heart palpitations|heart arrhythmia|heart attack)\b)

.+$

- **Label Mapping (Positive Terms):** cardiomegaly, enlarged heart, heart enlargement, heart size increased, heart size enlargement, cardiac enlargement, cardiac size increase
- **Label Mapping (Negative Terms):** None

**2. Enlarged Cardiomediastinum**

- **Description:** Identifies phrases indicating an enlarged heart or mediastinal structures, using specific anatomical and size-related keywords. It explicitly excludes terms related to mediastinal conditions that are not indicative of enlargement (e.g., shifts, lymph nodes).
- **RegEx Pattern:**

(?i)^

(?=.*\b(?:

cardiomediastinum|

cardiomediastinal|

pneumomediastinum|

mediastinum|

cardiothymic|

mediastinal|

cardiopericardial|

thymic|

vascular|

arterial|

costochondral|

hilar|

globular

)\b)

(?=.*\b(?:

enlarge(?:d|ment|ing)?|

big(?:ger|gest)?|

increase(?:d|s|ing)?|

dilate(?:d|ing)?|

prominence|

prominent(?:ly)?|

abnorm(?:al|ity|ally)|

borderline|

deviat(?:ed|ion|ing)?|

large\w*|

bulk\w*|

wide(?:en|r|ning)?|

thick(?:en|er|ening)?|

efface\w*|

exaggerate(?:d|ing)?

)\b)

(?!.*\b(?:

mediastinal shift|

mediastinal displacement|

mediastinal lymph node|

mediastinal lymphadenopathy|

mediastinal node

)\b)

.+$

- **Label Mapping (Positive Terms):** enlarged cardiomediastinum, cardiomediastinum, mediastinal enlargement, mediastinal contour enlargement, mediastinal silhouette enlargement, cardiomediastinal contour enlargement, enlarged mediastinal contours, mediastinal deviation
- **Label Mapping (Negative Terms):** enlarged hilar vessels, enlarged lymph nodes, atrial enlargement, vascular enlargement, hilar nodal enlargement, arterial enlargement, adenoidal enlargement, focal enlargement

**3. Pleural Other**

- **Description:** Captures general pleural abnormalities, while specifically excluding pleural effusion or pleural fluid.
- **RegEx Pattern:**

(?i)^

(?=.*\b(?:pleural|hemothorax|chylothorax|empyema|fibrothorax|pneumomediastinum|fibrosis|pleuro-parenchymal|pleuro-pericardial|pleurodynia|pleuropulmonary blastoma)\b)

(?!.*\b(?:pleural effusion|pleural fluid)\b)

.+$

- **Label Mapping (Positive Terms):** pleural, hemothorax, chylothorax, empyema, fibrothorax, pneumomediastinum, fibrosis, pleuro-parenchymal, pleuro-pericardial, pleurodynia, pleuropulmonary blastoma
- **Label Mapping (Negative Terms):** pleural effusion, pleural fluid

**4. Lung Lesion**

- **Description:** Identifies terms referring to localized abnormalities, masses, or growths within the lung.
- **RegEx Pattern:**

(?i)\b(?:mass(?:es)?|lump(?:s)?|nodul(?:e|es)?|lesion(?:s)?|carcinom(?:a|as)?|neoplasm(?:s)?|tumor(?:s)?)\b

- **Label Mapping (Positive Terms):** mass, lump, nodul, lesion, carcinom, neoplasm, tumor
- **Label Mapping (Negative Terms):** None

**5. Lung Opacity**

- **Description:** Captures various forms of lung opacities, requiring lung-related context for general terms and directly recognizing specific patterns (e.g., ground glass). It excludes negations and unrelated anatomical contexts.
- **RegEx Pattern:**

(?i)

(?:

(?:\b(?:lung|pulmonary|chest|thoracic|airspace|parenchymal)\b[\s,.-]*(?:\w+[\s,.-]*){0,3})

(?:\b(?:opaci\w+|density|consolidation|infiltrate\w*|haziness)\b)

|

(?:\b(?:opaci\w+|density|consolidation|infiltrate\w*|haziness)\b)

(?:[\s,.-]*\w+){0,3}[\s,.-]*\b(?:lung|pulmonary|chest|thoracic|airspace|parenchymal)\b

)

|

\b(?:

ground\s*glass\s*(?:opaci\w*|appearance|density|pattern|attenuation)|

(?:patchy|diffuse|bilateral|multifocal)\s+(?:opaci\w+|consolidation\w*)|

air[- ]?space\s+(?:disease|opaci\w+|consolidation\w*)|

interstitial\s+(?:lung\s+disease|pattern|marking\w*|opaci\w+)|

alveolar\s+(?:opaci\w+|infiltrate\w*|consolidation\w*)|

reticular\s+(?:pattern|marking\w*|opaci\w+)|

parenchymal\s+(?:opaci\w+|infiltrate\w*|consolidation\w*|haziness)|

peribronchial\s+(?:thickening|cuffing|infiltrate\w*)|

bronchial\s+wall\s+thickening|

reticulation\s+(?:pattern|marking\w*)|

pulmonary\s+(?:infiltrate\w*|consolidation\w*|opaci\w+)

)\b

(?!

(?:[\s,.-]*\b(?:

ruled\s+out|

negative\s+for|

absence\s+of|

excluded|

unlikely|

without|

free\s+of|

no\s+evidence\s+of|

not\s+(?:present|seen|visualized|identified)|

cannot\s+be\s+assessed

)\b)

|

(?:[\s,.-]*\b(?:

pleural\s+effusion|

mediastinum|

hilar|

bone\s+density|

soft\s+tissue|

diaphragm|

breast\s+density

)\b)

)

- **Label Mapping (Positive Terms):** lung opacity, lung opacities, pulmonary opacity, pulmonary opacities, opacification, airspace opacity, airspace opacities, airspace opacification, parenchymal opacity, parenchymal opacities
- **Label Mapping (Negative Terms):** lungs clear, clear lungs

**6. Edema**

- **Description:** Detects various forms of fluid accumulation in the lungs, including pulmonary, interstitial, and alveolar edema, as well as associated radiological signs.
- **RegEx Pattern:**

(?i)\b(?:

(?:pulmonary|lung)\s+edema|

edema(?:tous)?|

(?:interstitial|alveolar)\s+edema|

(?:perihilar|basilar)\s+edema|

fluid\s+overload|

vascular\s+congestion|

congestive\s+(?:pattern|changes)|

cephalization|

kerley\s+(?:a|b|c)\s+lines|

bat[-\s]wing\s+(?:appearance|pattern|distribution)|

butterfly\s+pattern

)\b

- **Label Mapping (Positive Terms):** edema
- **Label Mapping (Negative Terms):** None

**7. Consolidation**

- **Description:** Identifies areas of lung tissue filled with fluid or solid material, often associated with pneumonia, including focal, patchy, and lobar consolidation.
- **RegEx Pattern:**

(?i)\b(?:

consolidat(?:ion|ed|ive)|

(?:air[-\s]space|alveolar)\s+(?:consolidation|filling|opacity)|

(?:focal|patchy|complete|partial)\s+consolidation|

(?:right|left|bilateral)\s+(?:upper|lower|middle)\s+lobe\s+consolidation|

(?:lobar|segmental|subsegmental)\s+consolidation|

dense\s+(?:opacity|consolidation)|

consolidative\s+(?:process|change|opacity)|

area[s]?\s+of\s+consolidation

)\b

- **Label Mapping (Positive Terms):** consolidat
- **Label Mapping (Negative Terms):** None

**8. Pneumonia**

- **Description:** Recognizes explicit mentions of pneumonia and its variations (e.g., bronchopneumonia, pneumonitis), including the common abbreviation "PNA".
- **RegEx Pattern:**

(?i)\b(?:

pneumonia|

bronchopneumonia|

pleuropneumonia|

pneumonitis|

pna\b|

(?:bacterial|viral|fungal|aspiration)\s+pneumonia

)\b

- **Label Mapping (Positive Terms):** pneumonia
- **Label Mapping (Negative Terms):** None

**9. Atelectasis**

- **Description:** Detects collapse or incomplete expansion of lung tissue, including specific types like subsegmental and plate-like collapse, and general "volume loss."
- **RegEx Pattern:**

(?i)\b(?:

atelecta\w*|

collapse[ds]?|

volume loss|

subsegmental collapse|

plate(?:-|\s)?like collapse|

bibasilar collapse

)\b

- **Label Mapping (Positive Terms):** atelecta, collapse
- **Label Mapping (Negative Terms):** None

**10. Pneumothorax**

- **Description:** Identifies the presence of air in the pleural space, including various types of pneumothorax and associated phrases like "air in pleural space" and the abbreviation "PTX".
- **RegEx Pattern:**

(?i)\b(?:

pneumothora(?:x|ces)|

(?:tension|spontaneous|traumatic)\s+pneumothorax|

(?:right|left|bilateral)\s+pneumothorax|

(?:partial|complete|small|large|moderate)\s+pneumothorax|

air\s+(?:in|within)\s+(?:the\s+)?pleural\s+space|

pleural\s+air|

(?:apical|basilar)\s+pneumothorax|

pneumothorax\s+(?:noted|seen|identified|present)|

ptx\b

)\b

- **Label Mapping (Positive Terms):** pneumothora
- **Label Mapping (Negative Terms):** None

**11. Pleural Effusion**

- **Description:** Captures mentions of fluid accumulation in the pleural space, including "pleural effusion" and "pleural fluid."
- **RegEx Pattern:**

(?i)\b(?:

(?:pleural\s+)?effusion|

pleural\s+fluid(?:\s+(?:

accumulation|

build[-\s]?up|

presence|

noted|

seen|

identified|

detected|

collection

))?|

pleural\s+space\s+fluid

)\b

- **Label Mapping (Positive Terms):** effusion, pleural fluid
- **Label Mapping (Negative Terms):** None

**12. Fracture**

- **Description:** Identifies various types of bone fractures, including specific terms like "rib fracture" and general terms like "crack" or "broken," while excluding cardiac-related terms.
- **RegEx Pattern:**

(?i)\b(?:

fractur(?:e|ed|ing)|

(?:rib|vertebral|compression)\s+fracture|

(?:acute|chronic|healing|old)\s+fracture|

(?:linear|spiral|oblique|comminuted)\s+fracture|

(?:pathologic|traumatic)\s+fracture|

(?:stress|insufficiency)\s+fracture|

(?:displaced|non[-\s]displaced)\s+fracture|

(?:minimal|mild|moderate|severe)\s+(?:compression|deformity)|

(?:vertebral|body)\s+(?:compression|deformity)|

crack(?:ed)?|

break|broken|

discontinuity|

(?:bone|osseous)\s+(?:injury|defect)|

(?:wedge|biconcave)\s+deformity

)\b

(?!.*\b(?:heart|cardiac)\b)

- **Label Mapping (Positive Terms):** fractur, crack, fissure, disruption, malunion, nonunion
- **Label Mapping (Negative Terms):** crackle

**13. No Findings**

- **Description:** This category is typically determined by the *absence* of other CheXpert findings and the presence of negating phrases in the report. While not a direct regex pattern for "no findings," the absence of matches for the above positive patterns combined with phrases like "no acute cardiopulmonary abnormality" would indicate this label.
- **Note:** The provided code does not explicitly define a regex for "No Findings" but relies on the absence of other labels or specific negative phrases.

These patterns and mappings are used by the check_entity_for_label.py and get_labels_from_entity.py functions to process clinical text and assign appropriate CheXpert labels.
